# Supplementary material for: Photocatalytic Investigation of Aerosol-Assisted Atmospheric Pressure Plasma Deposited Hybrid TiO2 Containing Nanocomposite Coatings
Source: MDPI journal article supplement (doi:10.3390/nano12213758), 2022-10-26
Supplement: s1 [file s1]

## Supplementary materials

### Photocatalytic Investigation of Aerosol-Assisted Atmospheric Pressure Plasma Deposited Hybrid TiO<sub>2</sub> Containing Nanocomposite Coatings

Chiara Lo Porto <sup>1</sup>, Massimo Dell'Edera <sup>1</sup>, Ilaria De Pasquale <sup>1</sup>, Antonella Milella <sup>2,3</sup>,  
Francesco Fracassi <sup>2,3</sup>, Maria Lucia Curri <sup>1,2,\*</sup>, Roberto Comparelli <sup>1,\*</sup> and Fabio Palumbo <sup>3,\*</sup>

<sup>1</sup> CNR-IPCF, Istituto per i Processi Chimico-Fisici, S.S. Bari, c/o Dip. Chimica Via Orabona 4, 70126 Bari, Italy

<sup>2</sup> Dipartimento di Chimica, Università degli Studi di Bari Aldo Moro, Via Orabona 4, 70126 Bari, Italy

<sup>3</sup> CNR-NANOTEC, c/o Dip. Chimica Via Orabona 4, 70126 Bari, Italy

\* Correspondence: marialucia.curri@uniba.it (M.L.C.); roberto.comparelli@cnr.it (R.C.); fabio.palumbo@cnr.it (F.P.)

#### *Nanoparticles TiO<sub>2</sub> P25 characterization*

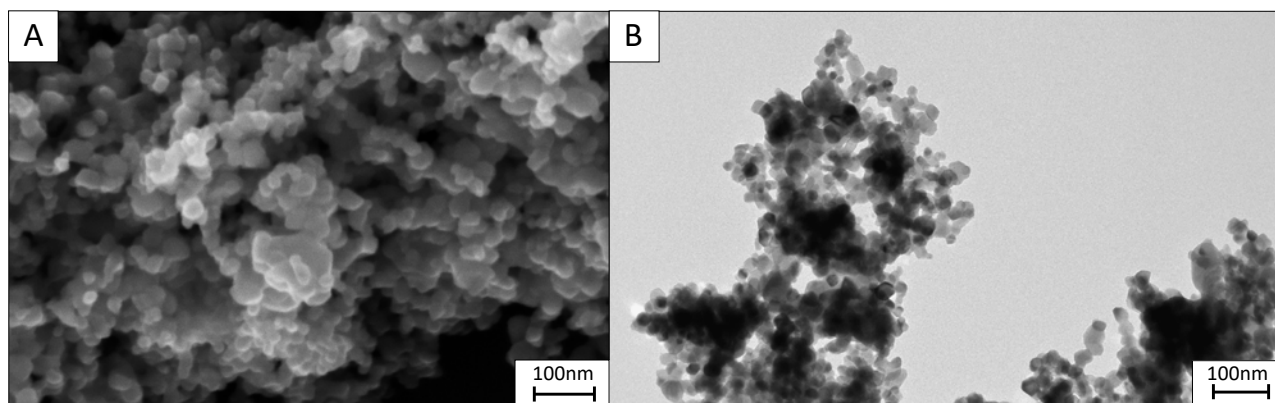

*Figure S1 Images of TiO<sub>2</sub> P25 (Evonik) acquired by A) scanning electron microscopy (SEM) at 300kx magnification and B) transmission electron microscopy (TEM)*

Transmission electron microscopy (TEM) analysis was performed by a JEOL JEM-1011 microscope operating at 100 kV. The TEM samples were prepared by casting a drop of TiO<sub>2</sub> methanol solution onto a carbon hollowed TEM grid.

## Plasma reactors

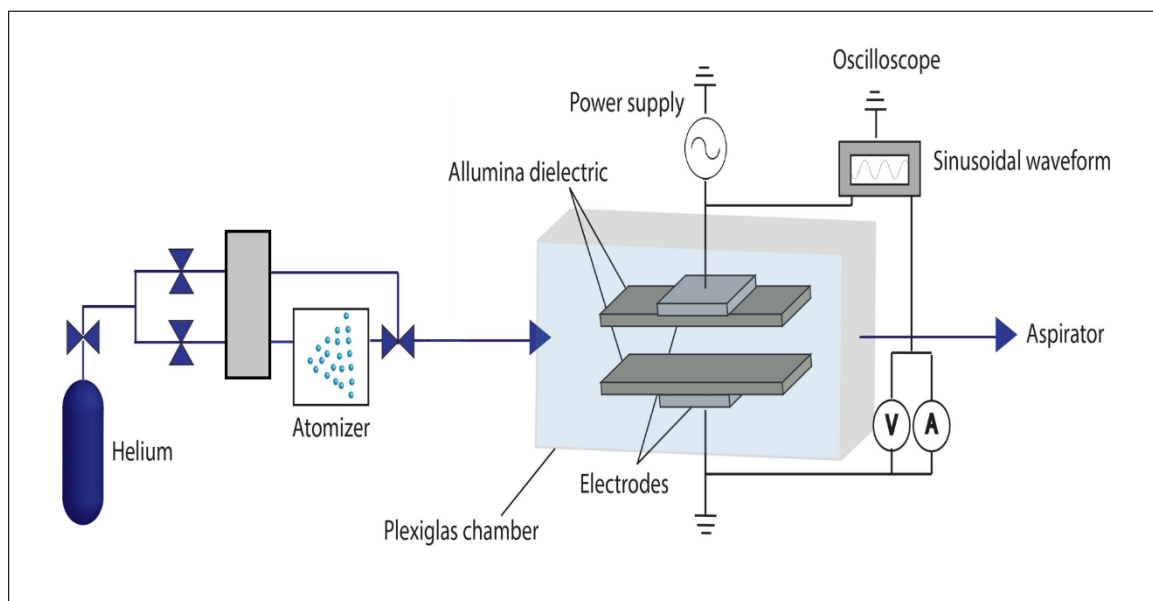

Figure S2 Scheme of the Dielectric Barrier Discharge (DBD) plasma reactor used for the plasma deposition. [1]

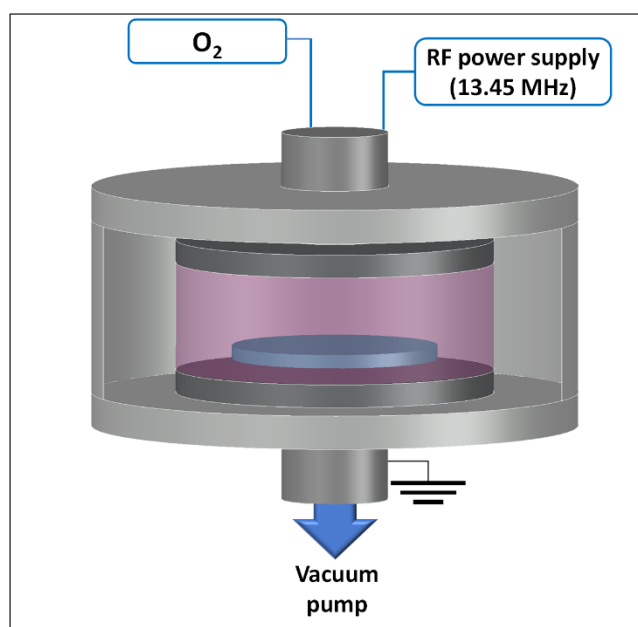

Figure S3 Scheme of the low pressure plasma reactor used for the plasma post-deposition treatment. [2]

### Coating characterization

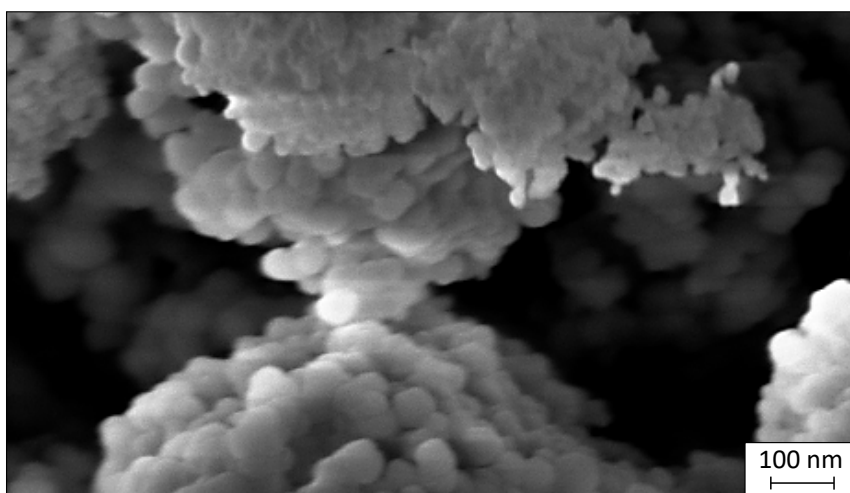

Figure S4 SEM image at 100kx magnification of PD20m coating.

### Test of the photocatalytic activity of the prepared coatings

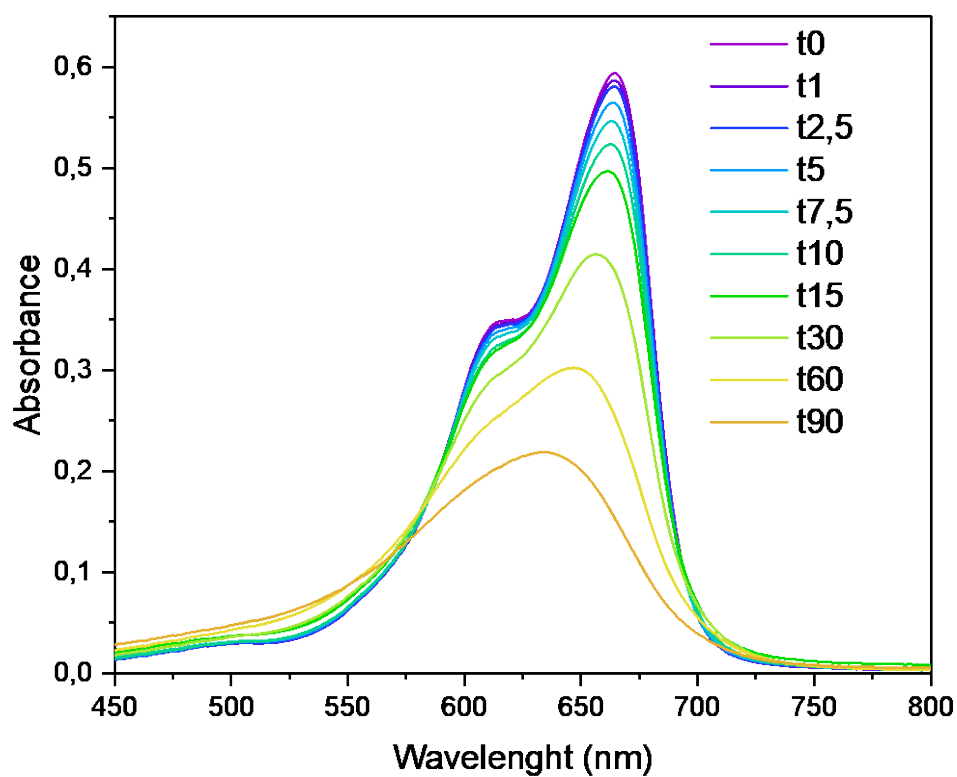

Figure S5 Absorbance spectra for  $10^{-5} M$  methylene blue (MB) over time (90 minutes in total) of exposure to UV light and contact with PD20m-P as a representative time evolution.

## References

1. Lo Porto, C.; Palumbo, F.; Buxadera-Palomero, J.; Canal, C.; Jelinek, P.; Zajickova, L.; Favia, P. On the Plasma Deposition of Vancomycin-Containing Nano-Capsules for Drug-Delivery Applications. *Plasma Process. Polym.* **2018**, *15* (5), 1700232. <https://doi.org/10.1002/ppap.201700232>.
2. Lo Porto, C.; Palumbo, F.; Somma, S.; Masiello, M.; Moretti, A.; Fracassi, F.; Favia, P. Plasma-Assisted Deposition of Fungicide Containing Coatings for Encapsulation and Protection of Maize Seeds. *Plasma Process. Polym.* **2019**, *16* (6), 1900022. <https://doi.org/10.1002/ppap.201900022>.
